# Supplementary material for: Integrated multi-omics analysis of ovarian cancer using variational autoencoders
Source: PubMed Central journal article supplement (PMC7973750; doi:10.1038/s41598-021-85285-4), 2021-03-18
Supplement: 41598_2021_85285_MOESM1_ESM.pdf [file 41598_2021_85285_MOESM1_ESM.pdf]

## Supplementary Documents

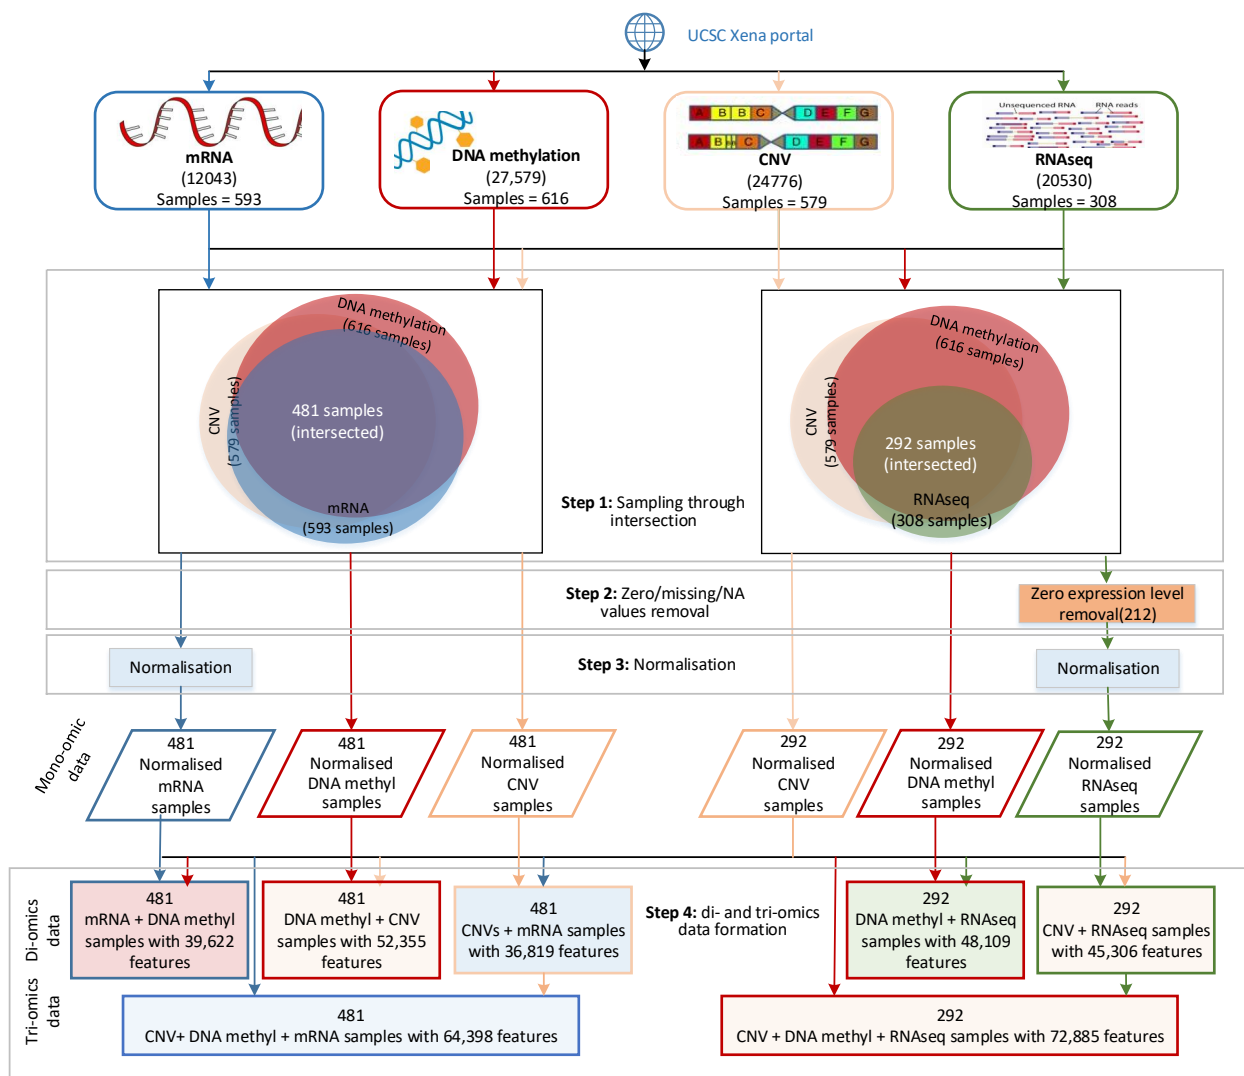

**Figure 6.** Data preprocessing with di- and tri-omics data generation. Uses a 4-steps process: first 3 steps (intersection, zero/missing/NA removal, and normalisation) for preprocessing, and step 4 is to generate di- and tri-omics data concatenating the corresponding mono omic datasets.

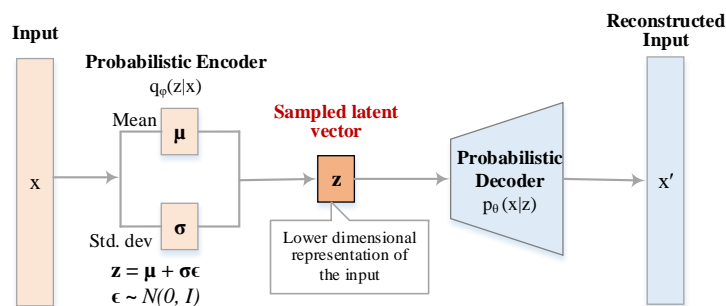

**Figure 7.** A basic architecture of a VAE that includes a probabilistic encoder that encodes the input  $x$  and a probabilistic decoder that decodes  $x'$  from latent vector  $z$ .

**Table 3.** Cancer identification performance of the LFs learned using the unsupervised methods

| Method        | Omics_data  | Accuracy    | Precision   | Recall      | f1 score    |
|---------------|-------------|-------------|-------------|-------------|-------------|
| PCA + SVM     | methylation | 99.10±1.22% | 0.992±0.011 | 0.991±0.012 | 0.991±0.012 |
| t-SNE + SVM   | methylation | 93.91±2.20% | 0.940±0.023 | 0.939±0.022 | 0.938±0.022 |
| VAE + SVM     | methylation | 99.10±0.98% | 0.992±0.009 | 0.991±0.010 | 0.991±0.010 |
| MMD-VAE + SVM | methylation | 99.44±0.76% | 0.995±0.007 | 0.994±0.008 | 0.994±0.008 |

**Table 4.** Ovarian cancer molecular subtypes classification performances (unsupervised LFs)

| Method        | Omics_data           | Accuracy     | Precision   | Recall      | f1 score    |
|---------------|----------------------|--------------|-------------|-------------|-------------|
| PCA + ANN     | CNV                  | 42.27±0.1%   | 0.393±0.01  | 0.423±0.01  | 0.358±0.01  |
| t-SNE + ANN   | CNV                  | 36.08±0.17%  | 0.426±0.016 | 0.361±0.01  | 0.286±0.01  |
| V-VAE + ANN   | CNV                  | 49.90±0.51%  | 0.493±0.010 | 0.499±0.05  | 0.481±0.01  |
| MMD-VAE + ANN | CNV                  | 52.58±0.40%  | 0.523±0.01  | 0.526±0.04  | 0.489±0.01  |
| PCA + ANN     | mRNA                 | 57.73±0.20%  | 0.451±0.01  | 0.577±0.01  | 0.505±0.01  |
| t-SNE + ANN   | mRNA                 | 64.54±0.82%  | 0.698±0.01  | 0.645±0.008 | 0.608±0.008 |
| V-VAE + ANN   | mRNA                 | 81.44±0.40%  | 0.822±0.03  | 0.814±0.029 | 0.814±0.028 |
| MMD-VAE + ANN | mRNA                 | 78.35±0.390% | 0.785±0.03  | 0.784±0.026 | 0.781±0.027 |
| PCA + ANN     | CNV_mRNA             | 32.99±0.31%  | 0.271±0.02  | 0.330±0.020 | 0.266±0.019 |
| t-SNE + ANN   | CNV_mRNA             | 38.14±0.29%  | 0.299±0.03  | 0.381±0.010 | 0.325±0.02  |
| V-VAE + ANN   | CNV_mRNA             | 73.20±0.22%  | 0.727±0.02  | 0.732±0.000 | 0.726±0.000 |
| MMD-VAE + ANN | CNV_mRNA             | 81.44±0.20%  | 0.817±0.01  | 0.814±0.000 | 0.813±0.000 |
| PCA + ANN     | CNV_mRNA_methylation | 37.11±0.45%  | 0.413±0.02  | 0.371±0.000 | 0.342±0.000 |
| t-SNE + ANN   | CNV_mRNA_methylation | 38.14±0.39%  | 0.561±0.03  | 0.381±0.000 | 0.344±0.000 |
| V-VAE + ANN   | CNV_mRNA_methylation | 78.35±0.2%   | 0.784±0.01  | 0.784±0.001 | 0.784±0.01  |
| MMD-VAE + ANN | CNV_mRNA_methylation | 80.21±0.19%  | 0.808±0.03  | 0.802±0.02  | 0.802±0.02  |

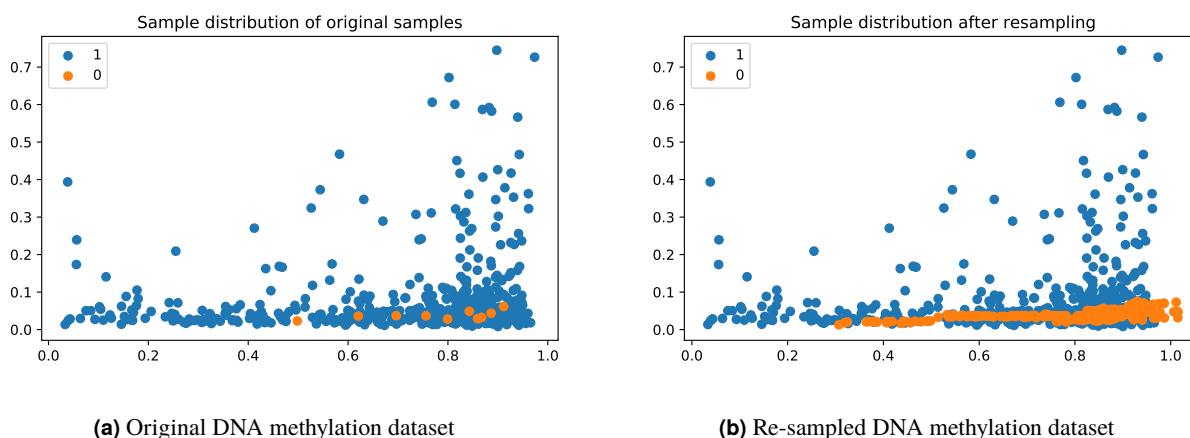

**Figure 8.** Distribution of normal and cancer samples in DNA methylation data from the GDC TCGA Ovarian Cancer (OV) (44):(a) the original dataset with 613 samples is highly imbalanced with 10 normal samples compared to the 603 cancer samples (class ratio: 1.36: 98:64), (b) Re-sampled datasets with 886 samples and with class ratio 31.94:68.06 between the normal and cancer samples. Legends: 0- Normal, 1- Cancer.

**Table 5.** Molecular subtypes classification accuracies for different sample sizes

| Sample size | Method  | Omics type | Accuracy |
|-------------|---------|------------|----------|
| 292         | VAE     | mono       | 93.1     |
| 292         | MMD-VAE | mono       | 94.3     |
| 292         | VAE     | tri        | 88.5     |
| 292         | MMD-VAE | tri        | 94.5     |
| 459         | VAE     | mono       | 93.7     |
| 459         | MMD-VAE | mono       | 92.3     |
| 459         | VAE     | tri        | 89.3     |
| 459         | MMD-VAE | tri        | 95.3     |
| 481         | VAE     | mono       | 95.7     |
| 481         | MMD-VAE | mono       | 93.8     |
| 481         | VAE     | tri        | 89.4     |
| 481         | MMD-VAE | tri        | 95.5     |

**Table 6.** Classification accuracy of survival subgroups

| Omic (s) data                    | Algorithm | Dataset  | Classification Accuracy |
|----------------------------------|-----------|----------|-------------------------|
| mRNA (mono-omics)                | MMD       | Training | 1                       |
| mRNA (mono-omics)                | MMD       | Test     | 0.84                    |
| mRNA_methylation (di-omics)      | MMD       | Training | 0.99                    |
| mRNA_methylation (di-omics)      | MMD       | Test     | 0.99                    |
| CNV_mRNA_methylation (tri-omics) | MMD       | Training | 1                       |
| CNV_mRNA_methylation (tri-omics) | MMD       | Test     | 1                       |

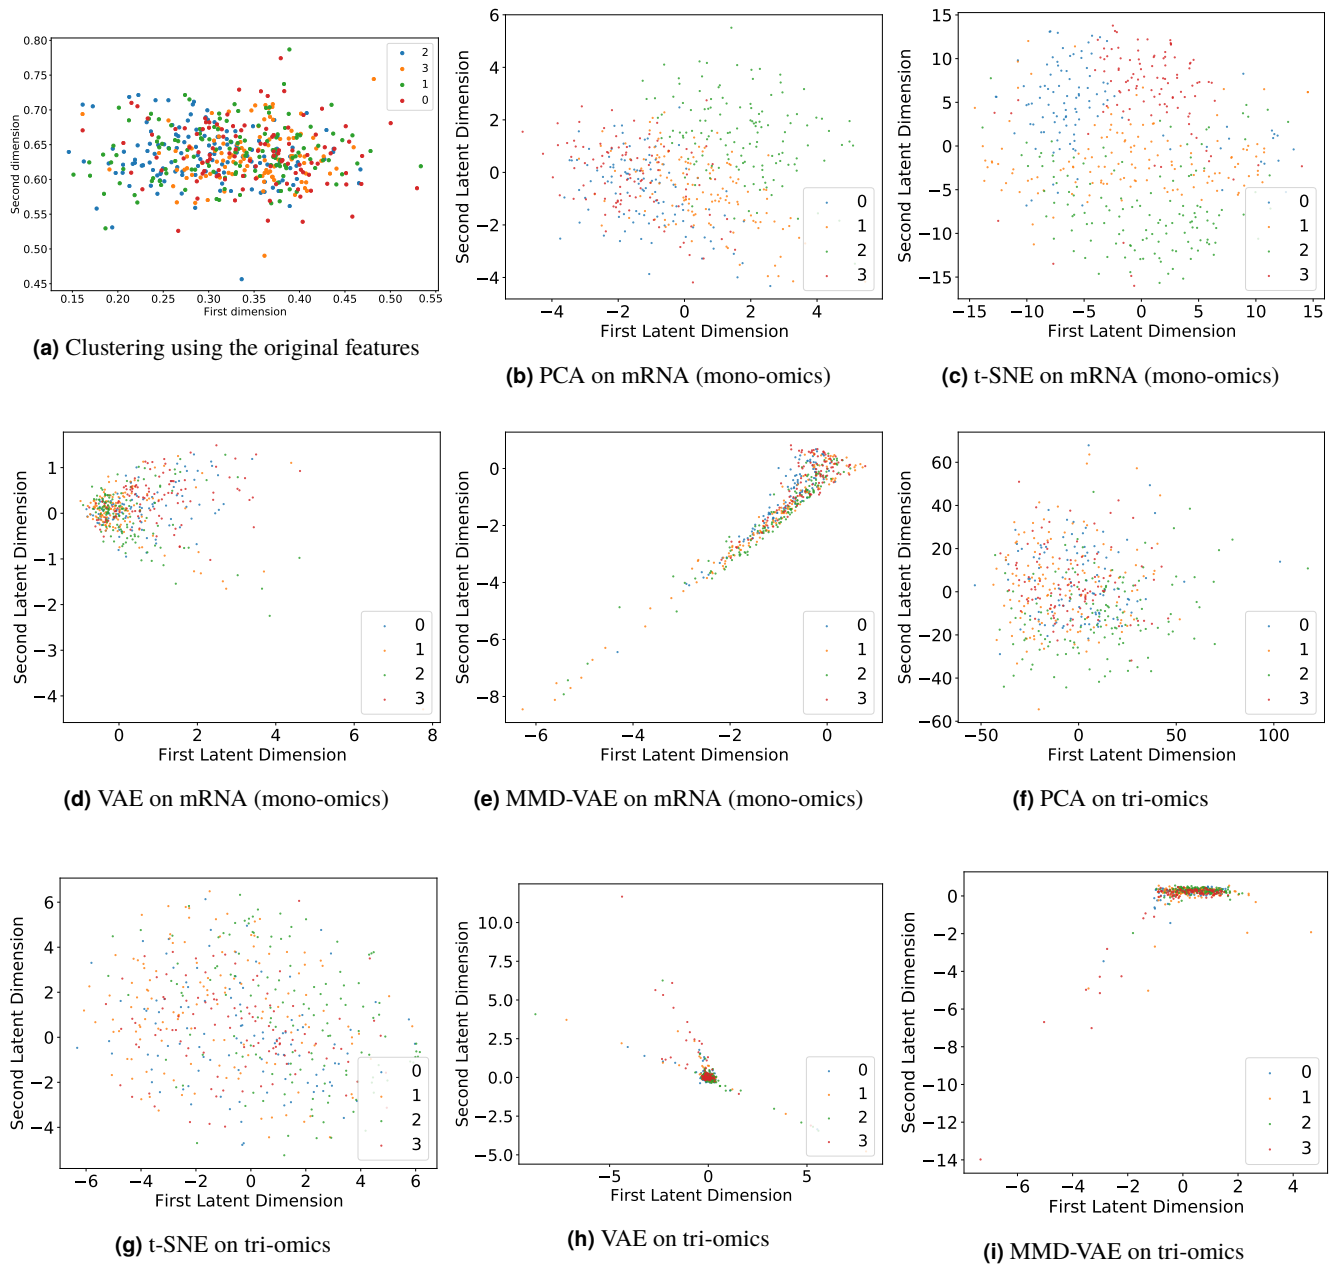

**Figure 9.** Molecular subtypes clustering using PCA, t-SNE, VAE, and MMD-VAE (2D or 2 LFs): Figure (a) represents the clustering of subtypes using the original mRNA. Figures (b)-(i) respectively present the subtypes clustering using the LFs learned from the mono-omics and tri-omics data through PCA, t-SNE, VAE, and MMD-VAE. Legends: 0- Immunoreactive, 1- Differentiated, 2- Proliferative and 3- Mesenchymal.

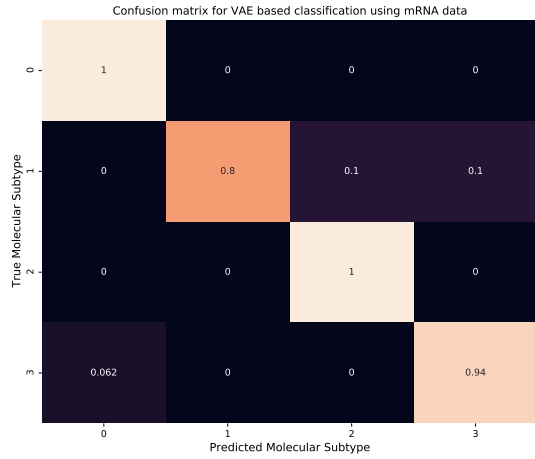

(a) CM for classification using VAE (mono-omics)

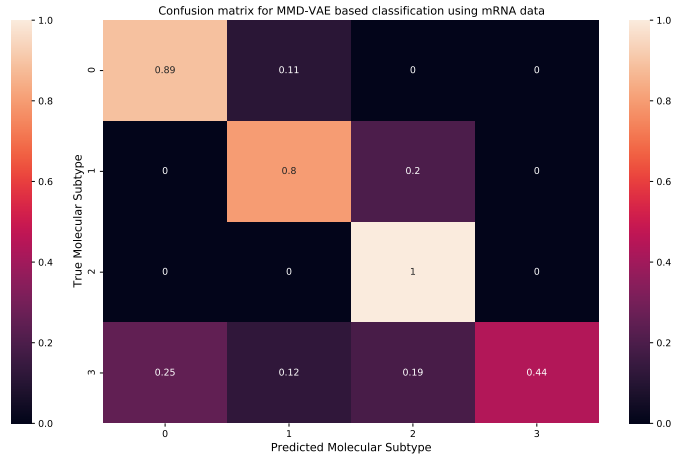

(b) CM for classification using MMD-VAE (mono-omics)

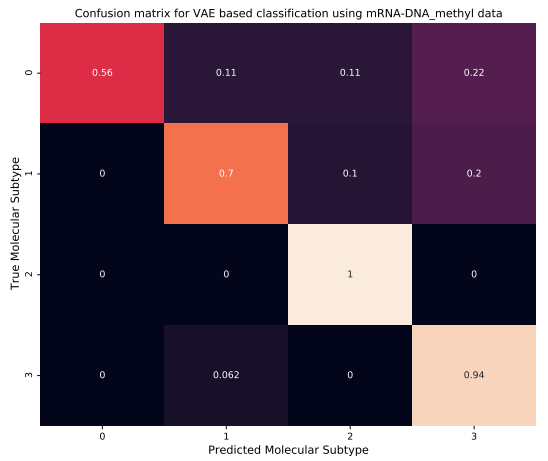

(c) CM for classification using VAE (di-omics)

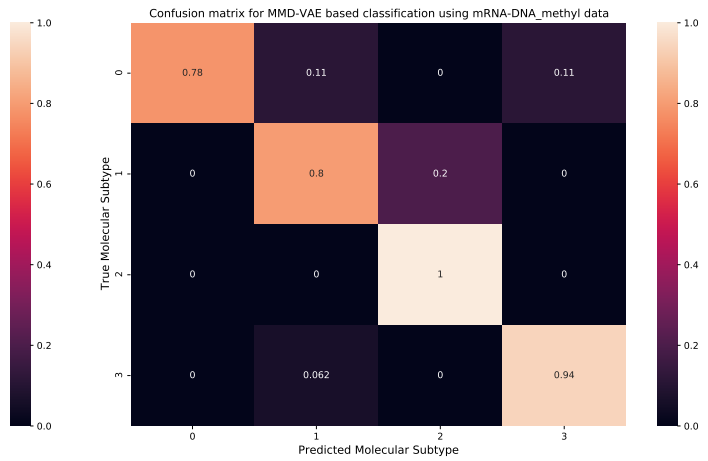

(d) CM for classification using MMD-VAE (di-omics)

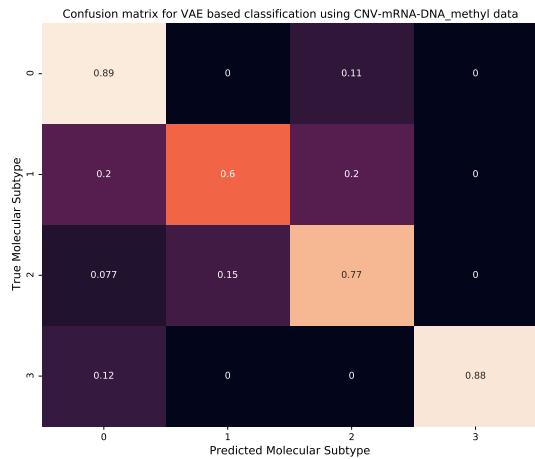

(e) CM for classification using VAE (tri-omics)

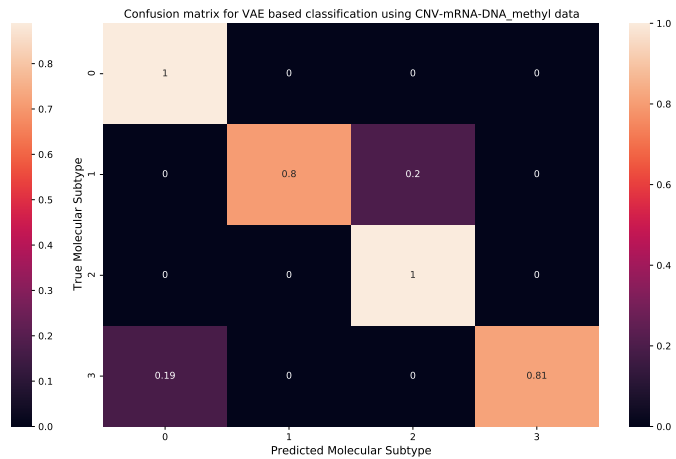

(f) CM for classification using MMD-VAE (tri-omics)

**Figure 10.** Confusion matrices of molecular subtypes using supervised VAE & MMD-VAE: (a)-(d) for mono-omics, (e) - (f) for di-omics and (g-h) tri-omics data. Legends: 0- Immunoreactive, 1- Differentiated, 2- Proliferative and 3- Mesenchymal, and CM- confusion matrix.

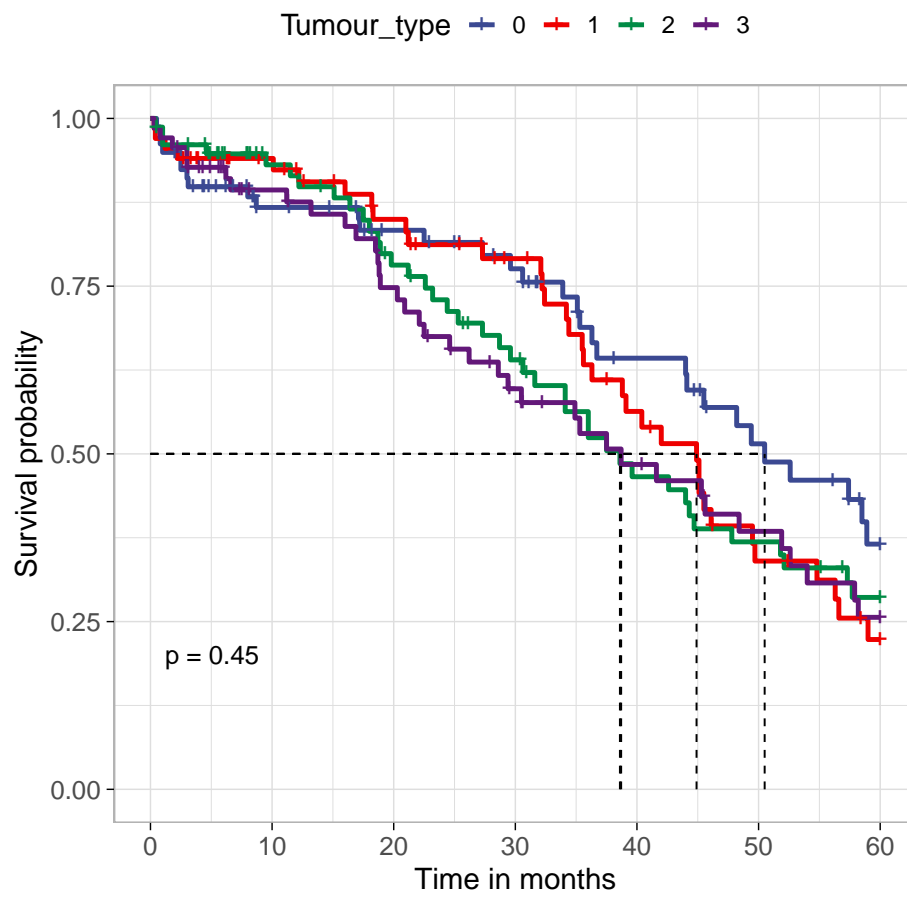

**Figure 11.** Survival analysis of existing molecular subtypes (292 samples)

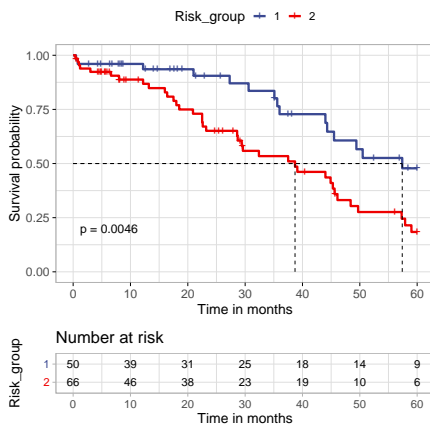

**(a) MMD-VAE(mono-omics) & Subgroups**

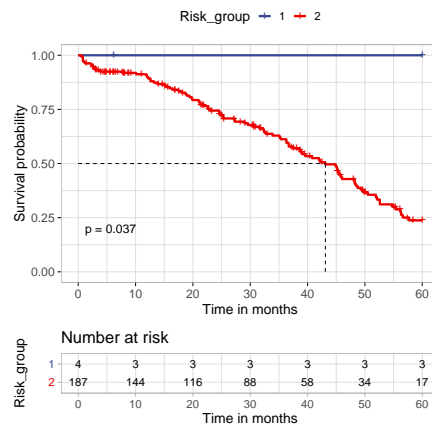

**(b) VAE(mono-omics) & Subgroups**

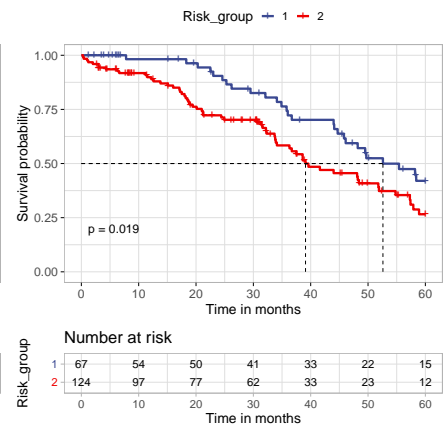

**(c) MMD-VAE(di-omics) & Subgroups**

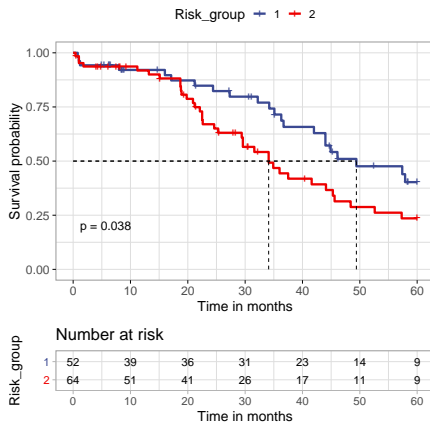

**(d) MMD-VAE(di-omics) & Subgroups**

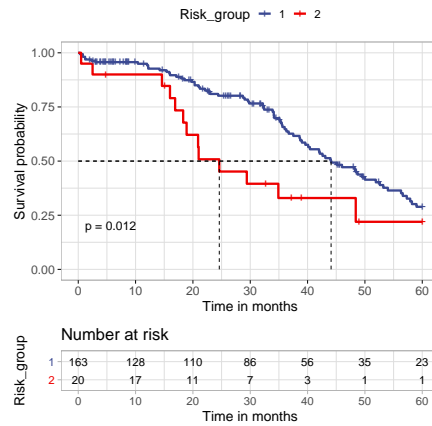

**(e) VAE (di-omics) & Subgroups**

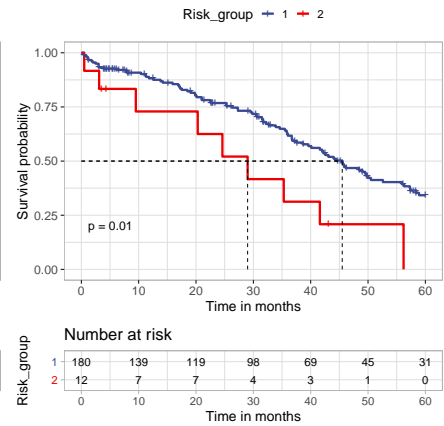

**(f) MMD-VAE (tri-omics) & Subgroups**

**Figure 12.** Predicted survival analysis using CRLFs-based subgroups: (a-f) survival analysis using the predicted subgroups show significant survival differences ( $p < .05$ ) between the groups. The results in Figure (a) and (d) for 292 samples, and the rest are for 481 samples.

**Table 7.** Performance of the DL architecture for VAE and MMD-VAE in survival prediction

| Omic-type            | Algorithm | Co-variates         | Dataset  | C-index | Brier score | p-value |
|----------------------|-----------|---------------------|----------|---------|-------------|---------|
| CNV                  | MMD       | Clinical            | Training | 0.64    | 0.194       | 0.003   |
| CNV                  | MMD       | Clinical            | Test     | 0.62    | 0.19        | 0.003   |
| CNV                  | MMD       | Clinical + subgroup | Training | 0.65    | 0.19        | 0.0006  |
| CNV                  | MMD       | Clinical + subgroup | Test     | 0.63    | 0.192       | 0.0006  |
| CNV                  | VAE       | Clinical            | Training | 0.65    | 0.186       | 0.0015  |
| CNV                  | VAE       | Clinical            | Test     | 0.64    | 0.23        | 0.0015  |
| CNV                  | VAE       | Clinical + subgroup | Training | 0.68    | 0.18        | 0       |
| CNV                  | VAE       | Clinical + subgroup | Test     | 0.66    | 0.24        | 0       |
| mRNA                 | MMD       | Clinical            | Training | 0.65    | 0.18        | 0.006   |
| mRNA                 | MMD       | Clinical            | Test     | 0.62    | 0.23        | 0.006   |
| mRNA                 | MMD       | Clinical + subgroup | Training | 0.67    | 0.18        | 0.006   |
| mRNA                 | MMD       | Clinical + subgroup | Test     | 0.60    | 0.23        | 0.006   |
| mRNA                 | VAE       | Clinical            | Training | 0.64    | 0.19        | 0.015   |
| mRNA                 | VAE       | Clinical            | Test     | 0.63    | 0.18        | 0.015   |
| mRNA                 | VAE       | Clinical + subgroup | Training | 0.63    | 0.19        | 0.017   |
| mRNA                 | VAE       | Clinical + subgroup | Test     | 0.62    | 0.18        | 0.017   |
| CNV_mRNA             | MMD       | Clinical            | Training | 0.67    | 0.177       | 0.00    |
| CNV_mRNA             | MMD       | Clinical            | Test     | 0.60    | 0.20        | 0.24    |
| CNV_mRNA             | MMD       | Clinical + subgroup | Training | 0.68    | 0.19        | 0.00003 |
| CNV_mRNA             | MMD       | Clinical + subgroup | Test     | 0.64    | 0.20        | 0.09    |
| CNV_mRNA             | VAE       | Clinical            | Training | 0.62    | 0.184       | 0.005   |
| CNV_mRNA             | VAE       | Clinical            | Test     | 0.65    | 0.193       | 0.045   |
| CNV_mRNA             | VAE       | Clinical + subgroup | Training | 0.63    | 0.183       | 0.0085  |
| CNV_mRNA             | VAE       | Clinical + subgroup | Test     | 0.65    | 0.193       | 0.09    |
| CNV_mRNA_methylation | MMD       | Clinical            | Training | 0.61    | 0.20        | 0.038   |
| CNV_mRNA_methylation | MMD       | Clinical            | Test     | 0.65    | 0.22        | 0.042   |
| CNV_mRNA_methylation | MMD       | Clinical + subgroup | Training | 0.64    | 0.19        | 0.01    |
| CNV_mRNA_methylation | MMD       | Clinical + subgroup | Test     | 0.66    | 0.23        | 0.08    |
| CNV_mRNA_methylation | VAE       | Clinical            | Training | 0.62    | 0.19        | 0.026   |
| CNV_mRNA_methylation | VAE       | Clinical            | Test     | 0.64    | 0.197       | 0.099   |
| CNV_mRNA_methylation | VAE       | Clinical + subgroup | Training | 0.62    | 0.188       | 0.083   |
| CNV_mRNA_methylation | VAE       | Clinical + subgroup | Test     | 0.63    | 0.195       | 0.10    |
